# Supplementary material
Source: MDPI journal article supplement (https://www.mdpi.com/2073-4395/12/2/341)
Supplement: s1 [file s1]

# Supplement

**Table S1.** Planted area, harvested area, production, and crop productivity in District of Samudera, North Aceh, Indonesia.

| No | Type of Plant | Planted Area (Ha) |         |        | Harvested Area (Ha) |         |       | Production (Tons/Ha) |       |       | Productivity (Q/Ha) |        |        |
|----|---------------|-------------------|---------|--------|---------------------|---------|-------|----------------------|-------|-------|---------------------|--------|--------|
|    |               | 2017              | 2018    | 2019   | 2017                | 2018    | 2019  | 2017                 | 2018  | 2019  | 2017                | 2018   | 2019   |
| 1  | Rice          | 2,008             | 2230.50 | 2230.5 | 1,943               | 2076.40 | 2,076 | 5.84                 | 5.47  | 5.47  | 58.41               | 54.66  | 54.66  |
| 2  | Soybean       | 0                 | 0       | 0      | 0                   | 0       | 0     | 0.00                 | 0.00  | 0.00  | 0.00                | 0.00   | 0.00   |
| 3  | Maize         | 9                 | 50      | 50     | 1                   | 12      | 12    | 4.95                 | 0.41  | 0.41  | 49.50               | 4.1    | 4.1    |
| 4  | Peanut        | 0                 | 1       | 1      | 0                   | 1       | 1     | 0.00                 | 0.00  | 0.00  | 0.00                | 0.00   | 0.00   |
| 5  | Cassava       | 4                 | 6       | 6      | 5                   | 7       | 7     | 21.63                | 15.45 | 15.45 | 216.32              | 154.51 | 154.51 |
| 6  | Sweet Potato  | 3                 | 8       | 8      | 3                   | 8       | 8     | 6.16                 | 2.31  | 2.31  | 61.63               | 23.11  | 23.11  |

Source: District of Samudera in Figures 2018, 2019 and 2020.
